# Supplementary material for: Facile synthesis of hierarchical pore foam catalysts with Brønsted–Lewis acid sites for the one-pot conversion of cellulose to 5-hydroxymethylfurfural
Source: Royal Society of Chemistry journal article supplement (doi:10.1039/c6ra14615e), 2016-01-01
Supplement: c6ra14615e1.pdf [file c6ra14615e1.pdf]

**Facile synthesis of hierarchical pore foam catalysts with Brønsted-Lewis acid sites for conversion of one-pot cellulose to 5-hydroxymethylfurfural**

Yating Shen<sup>a, b</sup>, Yunlei Zhang<sup>a, b</sup>, Enwei Zhu<sup>a, b</sup>, Yao Chen<sup>c</sup>, Pei Jin<sup>a</sup>, Meng Liu<sup>a</sup>, Yongsheng Yan<sup>a, b\*</sup>, Chunxiang Li<sup>a, b\*</sup>

<sup>a</sup> Institute of Green Chemistry and Chemical Technology

<sup>b</sup> School of Chemistry and Chemical Engineering, Jiangsu University, Zhenjiang, 212013, China

<sup>c</sup> School of the Environment and Safety Engineering, Jiangsu University, Zhenjiang 212013, China

\*Corresponding author: Professor Yongsheng Yan

E-mail: yysxszyz@126.com Tel.: +86 511 88791800 Fax: +86 511 88791800

\*Corresponding author: Professor Chunxiang Li

E-mail: lcx@ujs.edu.cn Tel.: +86 511 88791800 Fax: +86 511 88791800

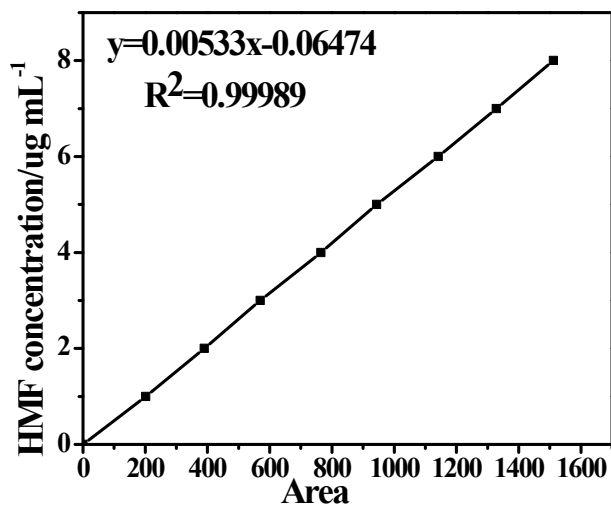

Fig. S1. Calibration curve of HMF.

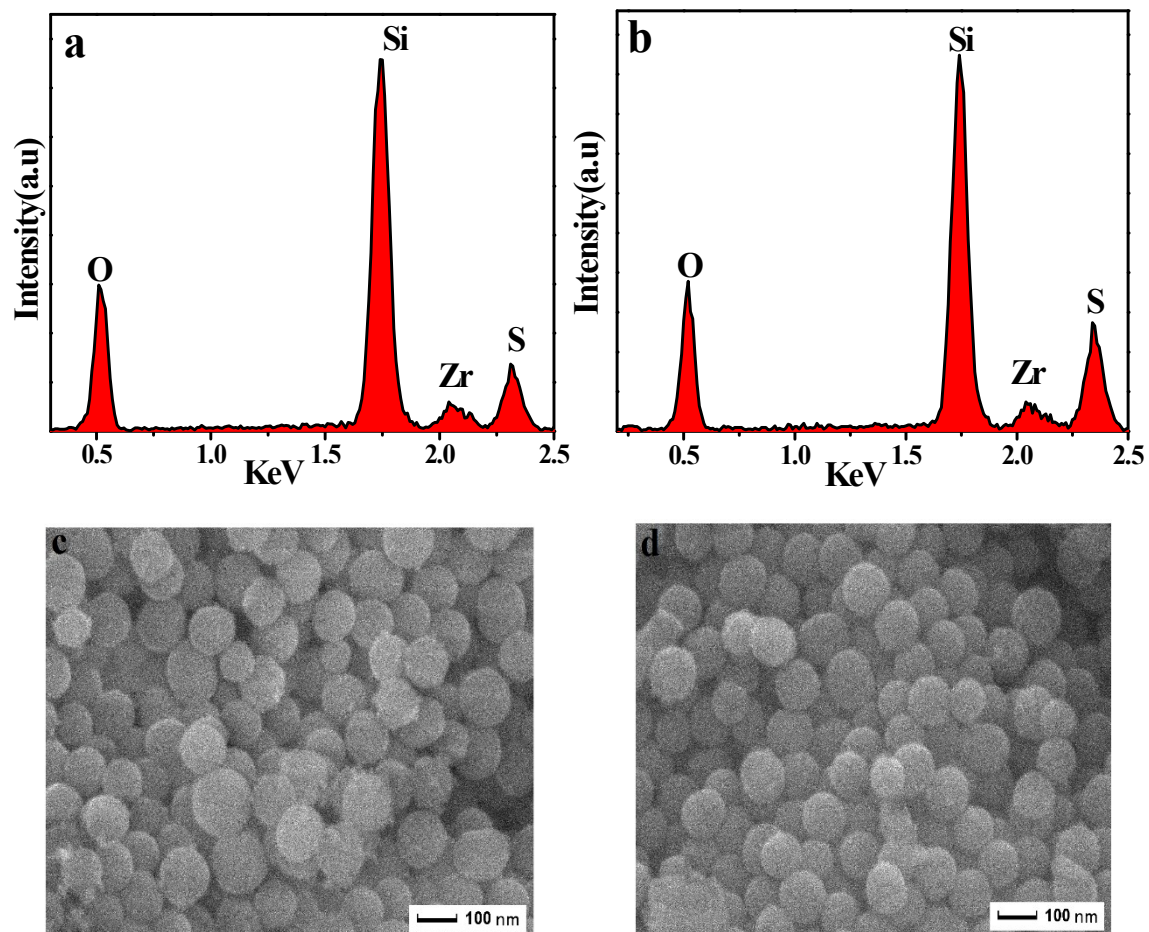

Fig. S2. EDS and SEM images of non-SZs (a, c) and meso-SZs (b, d).
